# Supplementary material for: Antibody and transcription landscape in peripheral blood mononuclear cells of elderly adults over 70 years of age with third dose of COVID-19 BBIBP-CorV and ZF2001 booster vaccine
Source: Immun Ageing. 2024 Jan 27;21:11. doi: 10.1186/s12979-023-00408-x (PMC10821575; doi:10.1186/s12979-023-00408-x)
Supplement: Supplementary file 3 — Additional file 3: Table S2. The characteristics of 35 participants boosted by ZF2001. [file 12979_2023_408_MOESM3_ESM.xlsx]

## Sheet: sheet1
Table S2 The characteristics of 35 participants boosted by ZF2001.
Characteristics	Group C	Group D	t or χ2	p
basis for grouping	boosted by ZF2001, <70 years old	boosted by ZF2001, ≥70 years old
Age(Median, range)	37.5(25, 49)	72 (70, 77)	-20.641	<0.001
Gender
male	12	7	0.614	0.433
female	8	8
7 days after vaccination
No. of serum samples	14	12	1.61	0.205
No. of PBMC samples	5	10
28 days after vaccination
No. of serum samples	20	15	1.326	0.25
No. of PBMC samples	5	8
*All participants have no comorbidities, no other vaccines received within one year, and no history of COVID-19 infection.
